# Supplementary material for: Rheological Characterization of Hydrogels from Alginate-Based Nanodispersion
Source: PubMed Central journal article supplement (PMC6419013; doi:10.3390/polym11020259), 2019-02-03
Supplement: polymers-11-00259-s001.pdf [file polymers-11-00259-s001.pdf]

# Supplementary Materials: Rheological Characterization of Hydrogels from Alginate-Based Nanodispersion

Francesca Cuomo, Martina Cofelice and Francesco Lopez

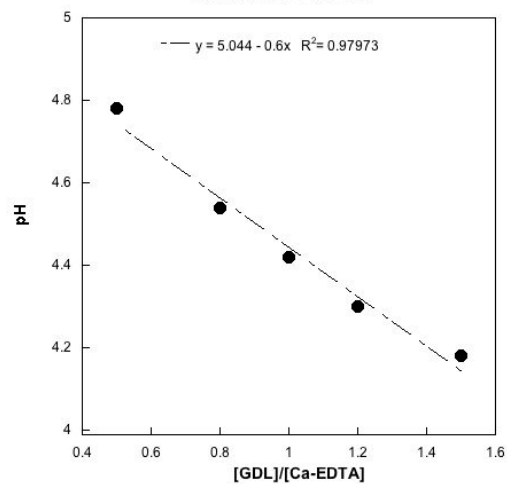

**Figure S1.** Calibration curve for the pH variation as function of GDL and Ca-EDTA complex.
